# Supplementary material for: miRNA Dysregulation in Keratinocyte Carcinomas: Clinical Evidence, Experimental Validation, and Future Directions
Source: Preprints.org preprint supplement (doi:10.20944/preprints202407.1323.v1), 2024-07-16
Supplement: Supplementary file 1 [file supplementary]

## Sheet: BCC
up	down	Reference
	miR-415a	Sun2018
miR-182		Sonkoly2012
miR-514		Sonkoly2012
	miR-203	Sonkoly2012
	miR-221	Sonkoly2012
	miR-486	Sonkoly2012
	miR-451	Sonkoly2012
	miR-10a	Sonkoly2012
	miR-28	Sonkoly2012
	miR-26a	Sonkoly2012
	miR-30e-5p	Sonkoly2012
	miR-16	Sonkoly2012
	miR-26b	Sonkoly2012
	miR-328	Sonkoly2012
	let-7b	Sonkoly2012
	miR-197	Sonkoly2012
	miR-361	Sonkoly2012
	let-7d	Sonkoly2012
	miR-374	Sonkoly2012
	miR-331	Sonkoly2012
	miR-193a	Sonkoly2012
	let-7f	Sonkoly2012
	miR-375	Sonkoly2012
	miR-15b	Sonkoly2012
	miR-335	Sonkoly2012
	miR-199b	Sonkoly2012
	miR-193b	Sonkoly2012
	miR-214	Sonkoly2012
	miR-27a	Sonkoly2012
	miR-199a	Sonkoly2012
	miR-660	Sonkoly2012
	miR-10b	Sonkoly2012
	miR-23a	Sonkoly2012
	miR-425-5p	Sonkoly2012
	miR-222	Sonkoly2012
	let-7a	Sonkoly2012
	miR-148a	Sonkoly2012
	miR-27b	Sonkoly2012
	miR-30e-5p	Sonkoly2012
	miR-429	Sonkoly2012
	miR-23b	Sonkoly2012
	miR-101	Sonkoly2012
	miR-99a	Sonkoly2012
	miR-148b	Sonkoly2012
	miR-29c	Sonkoly2012
	miR-152	Sonkoly2012
	miR-30a-3p	Sonkoly2012
	miR-365	Sonkoly2012
	miR-195	Sonkoly2012
	miR-532	Sonkoly2012
	miR-126	Sonkoly2012
	miR-411	Sonkoly2012
	miR-95	Sonkoly2012
	miR-196a	Sonkoly2012
	miR-452	Sonkoly2012
	miR-143	Sonkoly2012
	miR-20b	Sonkoly2012
	miR-383	Sonkoly2012
	miR-1	Sonkoly2012
	miR-34a	Hu2019
	miR-29c	Al-Eryani2018
	miR-381	Al-Eryani2018
	miR-452	Al-Eryani2018
	miR-487b	Al-Eryani2018
	miR-494	Al-Eryani2018
	miR-590-5p	Al-Eryani2018
miR-425-5p		Al-Eryani2018
miR-433		Al-Eryani2018
	miR-383-5p	Fastner2024
	miR-145-5p	Fastner2024
miR-2113		Wei2021
miR-1269b		Wei2021
miR-135a-3p		Wei2021
miR-551a		Wei2021
miR-548y		Wei2021
miR-548i		Wei2021
miR-9983-3p		Wei2021
miR-3180-3p		Wei2021
miR-675-5p		Wei2021
miR-542-3p		Wei2021
miR-550a-3p		Wei2021
miR-503-3p		Wei2021
miR-130b-5p		Wei2021
miR-96-5p		Wei2021
miR-6815-5p		Wei2021
miR-5695		Wei2021
miR-4662a-3p		Wei2021
miR-4708-3p		Wei2021
miR-1284		Wei2021
miR-431-3p		Wei2021
miR-584-5p		Wei2021
miR-941		Wei2021
miR-320d		Wei2021
miR-615-3p		Wei2021
miR-509-5p		Wei2021
miR-30c-1-3p		Wei2021
miR-320b		Wei2021
miR-125a-3p		Wei2021
miR-483-3p		Wei2021
miR-6766-3p		Wei2021
miR-25-5p		Wei2021
miR-335-5p		Wei2021
miR-3912-3p		Wei2021
miR-32-5p		Wei2021
miR-3913-3p		Wei2021
miR-1247-3p		Wei2021
miR-328-3p		Wei2021
miR-320c		Wei2021
miR-4636		Wei2021
miR-3690		Wei2021
miR-1910-5p		Wei2021
miR-508-5p		Wei2021
miR-30b-3p		Wei2021
miR-142-5p		Wei2021
miR-935		Wei2021
miR-130a-3p		Wei2021
miR-151b		Wei2021
miR-130a-5p		Wei2021
miR-509-3-5p		Wei2021
miR-513b-5p		Wei2021
miR-340-3p		Wei2021
miR-585-3p		Wei2021
miR-1843		Wei2021
	miR-133a-3p	Wei2021
	miR-561-5p	Wei2021
	miR-3529-3p	Wei2021
	miR-223-5p	Wei2021
	miR-21-3p	Wei2021
	miR-338-5p	Wei2021
	miR-27b-5p	Wei2021
	miR-598-3p	Wei2021
	miR-6516-5p	Wei2021
	miR-29c-5p	Wei2021
	miR-24-2-5p	Wei2021
	miR-27a-5p	Wei2021
	miR-18a-5p	Wei2021
	miR-942-5p	Wei2021
	miR-3934-5p	Wei2021
	miR-1303	Wei2021
	miR-205-3p	Wei2021
	miR-592	Wei2021
	miR-629-3p	Wei2021
	miR-382-5p	Wei2021
	miR-370-3p	Wei2021
	miR-3651	Wei2021
	miR-511-3p	Wei2021
	miR-454-3p	Wei2021
	miR-299-5p	Wei2021
	miR-7976	Wei2021
	miR-652-5p	Wei2021
	miR-135b-3p	Wei2021
	miR-624-5p	Wei2021
	miR-188-5p	Wei2021
	miR-641	Wei2021
	miR-134-5p	Wei2021
	miR-4677-5p	Wei2021
	miR-548k	Wei2021
	miR-34c-3p	Wei2021
	miR-1268b	Wei2021
	miR-766-3p	Wei2021
	miR-103a-2-5p	Wei2021
	miR-148a-5p	Wei2021
	miR-3176	Wei2021
	miR-944	Wei2021
	miR-203b-3p	Wei2021
	miR-6501-5p	Wei2021
	miR-184	Wei2021
	miR-4484	Wei2021
	miR-486-5p	Wei2021
	miR-329-3p	Wei2021
	miR-539-5p	Wei2021
	miR-362-5p	Wei2021
	miR-4488	Wei2021
	miR-6734-5p	Wei2021
	miR-3200-3p	Wei2021
	miR-502-3p	Wei2021
	miR-548o-3p	Wei2021
	miR-10b-3p	Wei2021
	miR-3194-3p	Wei2021
	miR-494-3p	Wei2021
	miR-618	Wei2021
	miR-501-3p	Wei2021
	miR-3065-5p	Wei2021
	miR-1908-5p	Wei2021
	miR-2355-3p	Wei2021
	miR-107	Wei2021
	miR-193b-5p	Wei2021
	miR-1294	Wei2021
	miR-1307-5p	Wei2021
	miR-4701-5p	Wei2021
	miR-891a-5p	Wei2021
	miR-500a-3p	Wei2021
	miR-642a-5p	Wei2021
	miR-1-3p	Wei2021
	miR-22-5p	Wei2021
	miR-548j-5p	Wei2021
	miR-362-3p	Wei2021
	miR-3659	Wei2021
	miR-4732-3p	Wei2021
	miR-513a-3p	Wei2021
	miR-548av-3p	Wei2021
	miR-18a-3p	Wei2021
	miR-378e	Wei2021
	miR-378g	Wei2021
	miR-4284	Wei2021
	miR-4664-5p	Wei2021
	miR-627-5p	Wei2021
	miR-378d	Wei2021
	miR-193a-3p	Wei2021
	miR-378c	Wei2021
	miR-3617-5p	Wei2021
	miR-6499-5p	Wei2021
	miR-885-5p	Wei2021
	miR-5187-5p	Wei2021
	miR-3944-5p	Wei2021
	miR-526a-5p	Wei2021
	miR-1299	Wei2021
	miR-10a-3p	Wei2021
	miR-629-5p	Wei2021
	miR-6887-3p	Wei2021
	miR-452-5p	Wei2021
	miR-3150b-3p	Wei2021
	miR-582-3p	Wei2021
	miR-548ar-3p	Wei2021
	miR-143-5p	Wei2021
	miR-512-5p	Wei2021
	miR-520d-5p	Wei2021
	miR-3150b-5p	Wei2021
	miR-145-3p	Wei2021
	miR-1973	Wei2021
	miR-520a-5p	Wei2021
	miR-517-5p	Wei2021
	miR-548d-3p	Wei2021
	miR-383-5p	Wei2021
	miR-152-5p	Wei2021
	miR-4517	Wei2021
	miR-520g-3p	Wei2021
	miR-1972	Wei2021
	miR-525-5p	Wei2021
	miR-3622a-5p	Wei2021
	miR-548e-3p	Wei2021
	miR-526b-5p	Wei2021
	miR-520h	Wei2021
	miR-203a-5p	Wei2021
	miR-517a-3p	Wei2021
	miR-1323	Wei2021
	miR-3619-3p	Wei2021
	miR-516a-5p	Wei2021
	miR-550b-2-5p	Wei2021
	miR-523-3p	Wei2021
	miR-378i	Wei2021
miR-233-3p		Sand2016
miR-197-3p		Sand2016
miR-342-3p		Sand2016
miR-505-3p		Sand2016
miR-204-5p		Sand2016
miR-941		Sand2016
miR-145-5p		Sand2016
miR-301-3p		Sand2016
miR-452-5p		Sand2016
miR-191-5p		Sand2016

## Sheet: cSCC
up	neutral	down	Reference	Reference #
miR-135b		miR-30a-3p	Sand2012
mir-21		miR-30a-5p	Sand2012
miR-31		miR-378	Sand2012
miR-424			Sand2012
miR-17-3p	miR-19a-5p		Sand2017
miR-17-5p	miR-19b-1-5p		Sand2017
miR-18a-3p	miR-20a-3p		Sand2017
miR-18a-5p	miR-20a-5p		Sand2017
miR-19a-3p	miR-92a-3p		Sand2017
miR-19b-3p	miR-92a-5p		Sand2017
miR-143-5p	miR-145-5p		Sand2017
	miR-191-5p		Sand2017
miR-21-5p	let-7a-5p		Bruegger2013
miR-31-5p	let-7b-5p		Bruegger2013
miR-205-5p	miR-17-5p		Bruegger2013
	miR-34a-5p		Bruegger2013
	miR-106a-5p		Bruegger2013
	miR-155-5p		Bruegger2013
	miR-203		Bruegger2013
miR-21-5p	miR-17-5p	let-7a-5p	Xu2012
miR-31-5p	miR-34a-5p	let-7b-5p	Xu2012
	miR-155-5p		Xu2012
	miR-184		Xu2012
	miR-203		Xu2012
	miR-205-5p		Xu2012
	miR-206		Xu2012
miR-21-5p	miR-205-5p	miR-203	Dzinunycz2010
miR-184			Dzinunycz2010
miR-31-5p	miR-21-5p		Rock2020
let-7g-5p	miR-93-5p		Rock2020
	miR-22-3p		Rock2020
miR-221	miR-34a		Tamas2023
miR-424	miR-103	miR-100	Mizrahi2018
miR-320	miR-15b	miR-101	Mizrahi2018
miR-222	miR-29b	miR-497	Mizrahi2018
miR-15a	miR-24	miR-199b-5p	Mizrahi2018
miR-223	miR-125a	miR-99a	Mizrahi2018
miR-19a	miR-30e	miR-30a	Mizrahi2018
miR-16	miR-199a-5p	miR-125b	Mizrahi2018
miR-221	miR-143	let-7c	Mizrahi2018
miR-27a		miR-148a	Mizrahi2018
miR-22		miR-140	Mizrahi2018
miR-423-3p		miR-30e-3p	Mizrahi2018
miR-107		miR-126-5p	Mizrahi2018
miR-210		miR-99b	Mizrahi2018
miR-205		miR-378	Mizrahi2018
		miR-199a-3p	Mizrahi2018
		miR-10b	Mizrahi2018
		miR-30d	Mizrahi2018
		miR-126	Mizrahi2018
		miR-195	Mizrahi2018
		miR-181a	Mizrahi2018
		miR-148b	Mizrahi2018
		miR-27b	Mizrahi2018
		let-7i	Mizrahi2018
		miR-92a	Mizrahi2018
miR-31-5p		miR-6782-5p	Hossain2024
miR-424-5p		miR-664b-3p	Hossain2024
miR-31-3p		miR-7975	Hossain2024
miR-1273c			Hossain2024
miR-4298			Hossain2024
miR-7847-3p			Hossain2024
miR-7107-5p			Hossain2024
miR-1224-5p			Hossain2024
miR-4306			Hossain2024
miR-7-5p			Hossain2024
miR-617			Hossain2024
miR-182-5p			Hossain2024
miR-1275			Hossain2024
miR-7150			Hossain2024
miR-1233-5p			Hossain2024
miR-34a-5p			Hossain2024
miR-142-5p			Hossain2024
miR-31			Fernandez-Figueraz2021
		miR-20a	Zhang2015
miR-135b		miR-215	Olasz2015
miR-142-5p		miR-10b	Olasz2015
miR-181a		miR-125b	Olasz2015
miR-18a		miR-200c	Olasz2015
		miR-10a	Olasz2015
		miR-191	Olasz2015
		miR-25	Olasz2015
		miR-203	Olasz2015
		miR-183	Olasz2015
		miR-100	Olasz2015
		miR-149	Olasz2015
		miR-15b	Olasz2015
		let-7c	Olasz2015
		miR-23b	Olasz2015
		miR-193a-5p	Olasz2015
		let-7b	Olasz2015
miR-31	miR-21	miR-34a	Pullford2022
	miR-181b	miR-200b	Pullford2022
	miR-200a	miR-200c	Pullford2022
	miR-205		Pullford2022
miR-1297		miR-20a-5p	Zou2021
miR-4465		miR-26b-5p	Zou2021
		miR-138-5p	Zou2021
miR-221			Gong2019
miR-346			Chen2016
miR-31			Wang2014
miR-486-3p			Li2022
miR-186			Hu2019
miR-675			Zhang2021
miR-217			Bai2017
miR-365			Zhou2013
miR-22			Yuan2021
miR-664			Li2019
miR-320a			Bi2021
miR-10b			Wimmer2020
miR-766			Liu2020
miR-365			Zhou2014
miR-186			Tian2018
miR-10a			Xiong2020
		miR-125b	Xu2012
		miR-204	Toll2016
		miR-199a-5p	Kim2015
		miR-361-5p	Kanitz2012
		miR-130a	Lohcharoenkal2021
		miR-125b	Tian2020
		miR-342-3p	Gong2022
		miR-497	Wei2018
		miR-214	Ma2020
		miR-124	Yamane2012
		miR-214	Yamane2012
		miR-203a-3p	Cheng2021
		miR-181a	Neu2017
		miR-23b	Sun2023
		miR-148a	Luo2015
		miR-203	Lohcharoenkal2016
		miR-342-3p	Zhang2020
		miR-199a	Wang2014
		miR-211-5p	Robinson2019
		miR-1193	Lu2021
		miR-1238-3p	Li2021
		miR-340	Wang2018
